# Supplementary material for: Management of the endodontic-periodontal lesion: a UK-based vignette survey of specialist clinicians
Source: Research Square preprint supplement (doi:10.21203/rs.3.rs-6189613/v1), 2025-04-30
Supplement: Supplementary file 2 [file 9aca6b06b6ea3d7123491298.docx]

| What is your post-graduate training in endodontics or periodontics? | - Mono-speciality training 3 years full-time or 4 years part-time- 68% (34) - Restorative dentistry training- 18% (9) - MSc with equivalence-based entry onto the specialist list- 14% (7) |
| --- | --- |
| At which institute did you carry out your post-graduate endodontic or periodontic training? | - King’s College London – 34% (17) - Eastman Dental Institute- 22% (11) - University of Liverpool- 14% (7) - Queen Mary University of London- 6% (3) - Manchester University Dental Hospital- 6% (3) - Leeds Dental Institute- 6% (3) - University of Sheffield- 4% (2) - University of Birmingham- 4% (2) - University of Otago- 2% (1) - Aristotle University Thessaloniki- 2% (1) |
| Where do you predominantly work? | - Private practice- 56% (28) - Dental hospital/ school- 22% (11) - Mixture of above- 22% (11) |

Demographic data of participants

## Notable effects of other participant demographics on results

Two notable trends were found when stratifying data according to participant demographics other speciality type.

Participants with mono-speciality training demonstrated a higher preference for the Herrera*et al.* (1) classification system, while other systems were more evenly selected among participants who didn’t undergo mono-speciality training. Participants who completed mono-speciality training were also more likely to predict higher survival rates.

| **Training** | Herrera*et al.* (1) | Simon*et al.* (2) | Kim and Kratchman (3) | Dietrich*et al.* (4) |
| --- | --- | --- | --- | --- |
| Non-mono-speciality training, n=16 | 19% | 38% | 19% | 19% |
| Mono-speciality training, n=34 | 50% | 35% | 6% | 0% |

Classification systems selected according to mode of post-graduate training

| **Training** | <1 year | 1-3 years | 3-5 years | >5 years | |
| --- | --- | --- | --- | --- | --- |
| MSc with equivalence-based entry onto the specialist list, n=5 | 40% | 60% | 0% | | 0% |
| Mono-speciality training 3 years full-time or 4 years part-time, n=21 | 9.52% | 42.86% | 23.81% | | 23.81% |
| Restorative dentistry speciality training with entry onto the specialist endodontic or periodontic lists, n=6 | 0% | 83.33% | 16.67% | | 0% |

Predicted survival rates according to mode of post-graduate training

***References***

1. Herrera D, Retamal-Valdes B, Alonso B, Feres M. Acute periodontal lesions (periodontal abscesses and necrotizing periodontal diseases) and endo-periodontal lesions. J Clin Periodontol. 2018;45(S20):S78-S94.

2. Simon JH, Glick DH, Frank AL. The relationship of endodontic‐periodontic lesions. J Periodontol. 1972;43(4):202-8.

3. Kim S, Kratchman S. Modern endodontic surgery concepts and practice: a review. J Endod. 2006;32(7):601-23.

4. Dietrich T, Zunker P, Dietrich D, Bernimoulin J-P. Apicomarginal defects in periradicular surgery: Classification and diagnostic aspects. Oral Surgery, Oral Medicine, Oral Pathology, Oral Radiology, and Endodontology. 2002;94(2):233-9.
